# Supplementary material for: Multiple splitting of droplets using multi-furcating microfluidic channels
Source: bioRxiv or medRxiv preprint supplement (doi:10.1101/513812), 2019-01-07
Supplement: Supplementary file [file media-1.pdf]

## Supplementary Information

### Multiple splitting of droplets using multi-furcating microfluidic channels

Zida Li<sup>1,\*</sup>, Luoquan Li<sup>2</sup>, Meixiang Liao<sup>2</sup>, Liqun He<sup>2</sup>, Ping Wu<sup>2,3,4,+,\*</sup>

<sup>1</sup>Department of Biomedical Engineering, School of Medicine, Shenzhen University, Shenzhen 518060, China; <sup>2</sup>Department of Thermal Science and Energy Engineering, University of Science and Technology of China, Hefei 230027, China; <sup>3</sup>BGI-Shenzhen, Shenzhen 518083, China; <sup>4</sup>China National GeneBank, BGI-Shenzhen, Shenzhen 518120, China.

<sup>+</sup>Current address: Direct Genomics, Shenzhen 518023, China

\*Correspondence: [zidali@szu.edu.cn](mailto:zidali@szu.edu.cn); [wuping@mail.ustc.edu.cn](mailto:wuping@mail.ustc.edu.cn)

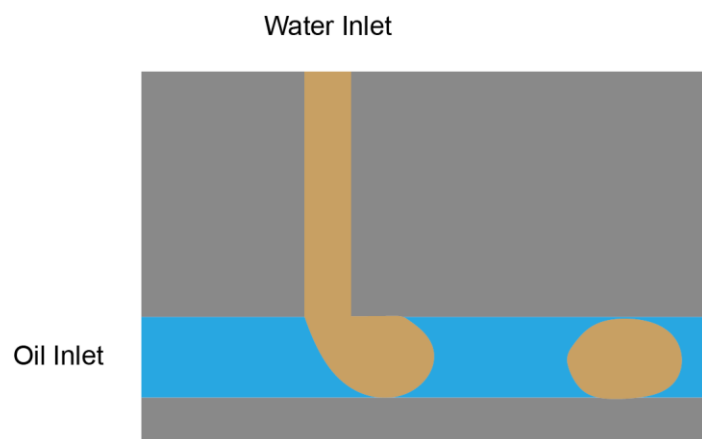

Figure S1. Generation of mother droplets using T-junctions.

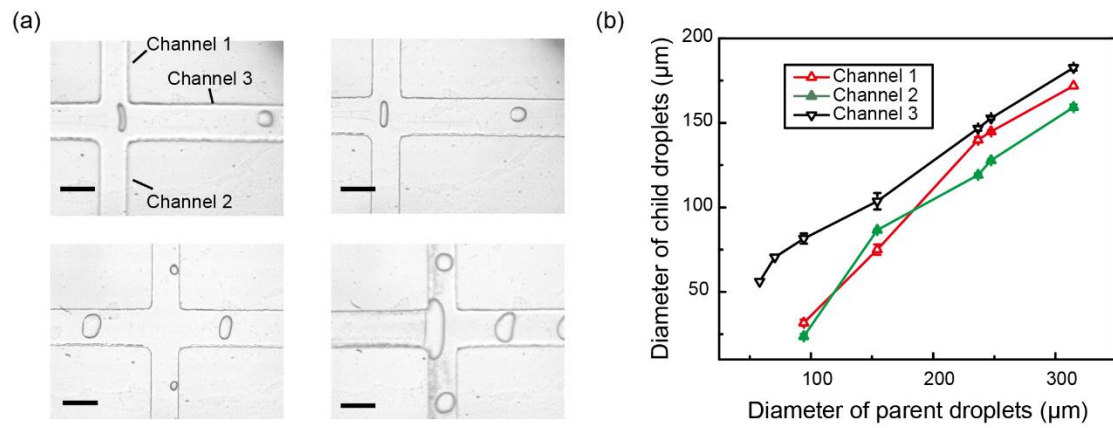

Figure S2. The effect of mother droplet size on the resultant daughter droplets in one-to-three junctions. (a) The amount of daughter droplets increased from one to three, as the size of mother droplets increased. Scale bar, 200  $\mu\text{m}$ . (b) The diameters of daughter droplets plotted as a function of the diameter of mother droplets. Channel names are designated in Figure S2a.
